# Supplementary material for: Pilot study of an integrated model of sleep support for children: a before and after evaluation
Source: PubMed Central journal article supplement — BMJ Paediatr Open. 2019 Nov 10;3(1):e000551. doi: 10.1136/bmjpo-2019-000551 (PMC6863653; doi:10.1136/bmjpo-2019-000551), 2019-11-10
Supplement: bmjpo-2019-000551.draft_revisions.pdf [file bmjpo-2019-000551.draft_revisions.pdf]

# BMJ Paediatrics Open

BMJ Paediatrics Open is committed to open peer review. As part of this commitment we make the peer review history of every article we publish publicly available.

When an article is published we post the peer reviewers' comments and the authors' responses online. We also post the versions of the paper that were used during peer review. These are the versions that the peer review comments apply to.

The versions of the paper that follow are the versions that were submitted during the peer review process. They are not the versions of record or the final published versions. They should not be cited or distributed as the published version of this manuscript.

BMJ Paediatrics Open is an open access journal and the full, final, typeset and author-corrected version of record of the manuscript is available on our site with no access controls, subscription charges or pay-per-view fees (<http://bmjpaedsopen.bmj.com>).

If you have any questions on BMJ Paediatrics Open's open peer review process please email [info.bmjpo@bmj.com](mailto:info.bmjpo@bmj.com)

# BMJ Paediatrics Open

## Pilot Study of an Integrated Model of Sleep Support for Children: A Before and After Evaluation

|                               |                                                                                                                                                                                                                                                                                                                                                                                                                                                                                    |
|-------------------------------|------------------------------------------------------------------------------------------------------------------------------------------------------------------------------------------------------------------------------------------------------------------------------------------------------------------------------------------------------------------------------------------------------------------------------------------------------------------------------------|
| Journal:                      | <i>BMJ Paediatrics Open</i>                                                                                                                                                                                                                                                                                                                                                                                                                                                        |
| Manuscript ID                 | bmjpo-2019-000551                                                                                                                                                                                                                                                                                                                                                                                                                                                                  |
| Article Type:                 | Original article                                                                                                                                                                                                                                                                                                                                                                                                                                                                   |
| Date Submitted by the Author: | 08-Jul-2019                                                                                                                                                                                                                                                                                                                                                                                                                                                                        |
| Complete List of Authors:     | Elphick, Heather; Sheffield Children's Hospital, Department of Respiratory Medicine<br>Lawson, Candi; Sheffield City Council<br>Ives, Ann; Sheffield City Council<br>Siddall, Sue; Sheffield City Council<br>Kingshott, Ruth; Sheffield Children's Hospital, Paediatric Respiratory Department.<br>Reynolds, Janine; Sheffield Children's Hospital, Department of Respiratory Medicine<br>Dawson, Victoria; The Children's Sleep Charity<br>Hall, Lorraine; Sheffield City Council |
| Keywords:                     | Sleep                                                                                                                                                                                                                                                                                                                                                                                                                                                                              |
|                               |                                                                                                                                                                                                                                                                                                                                                                                                                                                                                    |

SCHOLARONE™  
Manuscripts

# Pilot Study of an Integrated Model of Sleep Support for Children: A Before and After Evaluation

Heather E Elphick\*, Candi Lawson, Ann Ives, Sue Siddall, Ruth N Kingshott, Janine Reynolds, Victoria Dawson, Lorraine Hall.

Sleep Service, Sheffield Children's NHS Foundation Trust, UK

Commissioning, Inclusion and Learning Service, Sheffield City Council, UK

The Children's Sleep Charity, UK

\*Corresponding author

Professor Heather Elphick

Sheffield Children's Hospital

Western Bank

Sheffield

S10 2TH

0114 2717400

[heather.elphick@sch.nhs.uk](mailto:heather.elphick@sch.nhs.uk)

Keywords: Sleep, Children, Behavioural Intervention, Implementation

Word count: 3266

## Abstract

**Objective:** Despite the success of behavioural sleep support interventions in the third sector, sleep support is not universally available for families in the UK. The aim of the study was to provide evidence of efficacy and to propose a delivery model for integrated sleep support for families of vulnerable children.

**Design and setting:** A sleep support intervention was carried out in Sheffield Local Authority evaluated using a pre- and post-intervention study design by Sheffield Children's NHS Trust.

**Participants:** Fifty-six children aged 6-16 years with significant sleep problems were recruited; 39 completed the intervention and evaluation.

**Interventions:** Basic sleep education and an individualised programme was delivered by a sleep practitioner. Follow-on telephone support was provided to empower the parent (and/or young person) to carry out the sleep programme at home. An integrated NHS and Local Authority delivery model was designed and implemented.

**Results:** Parents' ratings of their child's ability to self-settle improved from 1.1/10 to 6.4/10 ( $p < 0.05$ ). Mean Warwick-Edinburgh Mental Wellbeing Scale scores improved significantly for parents/carers (MD 4.10, 95% confidence intervals 3.75-4.42,  $p < 0.05$ ). Children that completed the intervention gained on average an extra 2.4 hours sleep a night. There was reduction in healthcare utilisation, illnesses and medication use.

**Conclusions:** The behavioural approach to sleep support for these vulnerable groups of children is highly effective. Follow-on individual support to empower parents is key to achieving success. Sleep support can be implemented in NHS and Local Authority services by integration into the existing workforce using a cross-agency model.

**Word count 246**

## Introduction

Sleep is a restorative process, fundamental to physical and psychological health<sup>1</sup>. Approximately 30% of young children experience sleep difficulties in the form of bedtime resistance and night time waking; termed as behavioural insomnia<sup>2</sup>. These difficulties can arise from the way parents manage their child's sleep<sup>3</sup> and can be effectively treated with a behavioural approach<sup>4</sup>.

The impact of sleep disturbance on children's health is wide-ranging including difficulties with mood, psychosocial problems and a detrimental impact on the child's cognitive ability and learning<sup>5,6</sup>.

Parents of children with sleep difficulties can suffer high levels of stress and anxiety, decreased ability to work or to drive safely, relationship and financial problems<sup>7,8,9</sup>. These stresses lead to an increased demand on NHS primary care services and to prescriptions of drugs such as antidepressants.

Evidence from sleep clinics delivered in the voluntary sector has shown that an intensive behavioural intervention can be highly effective<sup>10</sup>. However, recognition of sleep deprivation as a factor in psychosocial morbidity has not been an NHS priority and resources are scarce.

A partnership comprising Sheffield Children's NHS Trust (SCH), Sheffield City Council (SCC) and The Children's Sleep Charity (TCSC) carried out and evaluated an intensive behavioural intervention delivered by community practitioners to provide support to parent/carers and young people to improve sleep patterns for vulnerable children (The Sheffield Children and Young People Sleeping Well Project). A proposed integrated delivery model was developed and has begun to be implemented to provide cross-agency sleep support within the city.

## Methods

The study design was a pre- and post- evaluation of a behavioural sleep intervention in the form of a workshop or clinic appointment with follow-up support. A control group was not included.

### Patient Involvement

Members of the Sheffield parent carer forum were involved in the concept and development of the study. Two parent/carers sat on the strategic committee which discussed strategies for gathering evidence and implementation of city-wide services.

### Recruitment

Children and young people aged 6-16 years known to have a sleep problem were identified by their care or clinical teams. Children with either with ADHD or Looked After/adopted children (or both) were selected as being two groups of children highlighted by service managers as being vulnerable and therefore priority groups for intervention. Children with a Composite Sleep Disturbance Index<sup>11</sup> score of 3 or more, indicating significant problems with settling to sleep and/or waking at night were eligible for inclusion. Children with a specific sleep or medical disorder (for example sleep apnoea, pain, respiratory or gastrointestinal symptoms or seizures) or any family in whom the social worker or clinician was aware of other issues taking priority over sleep problems were excluded. Those that did not proceed with the study were signposted back into the appropriate clinical or Local Authority services for further evaluation.

### Intervention

Two experienced practitioners with Parenting and Learning Mentor roles within the Local Authority early intervention team delivered the sleep support interventions over a 10-month period. The practitioners had previously received accredited sleep practitioner training through TCSC ([www.thechildrensleepcharity.org.uk](http://www.thechildrensleepcharity.org.uk)). The objective of the intervention was to provide bespoke

1  
2  
3 support to parents/carers and/or young people, to skill and empower them to implement a  
4  
5 behavioural sleep programme at home to improve their child's/their night-time behaviour with  
6  
7 ongoing support from the practitioners.  
8  
9

10  
11  
12 The intervention was delivered via a 3-hour workshop for 4-6 families or via a 1 to 1 clinic model  
13  
14 (decided on a case by case basis according to age, preference and workshop availability). In both  
15  
16 settings, education about basic sleep physiology was given followed by a one-to-one consultation to  
17  
18 explore possible solutions to sleep problems by developing an individualised sleep programme. The  
19  
20 programme included a consistent routine, removal of technology from the bedroom, hand-eye co-  
21  
22 ordination activities for the hour before bedtime, melatonin-producing supper-time foods,  
23  
24 avoidance of caffeine and changes to the bedroom environment.  
25  
26  
27  
28  
29

30 The delivery was targeted at parents in the case of children aged 1-11 years and at the young person  
31  
32 with or without parents in the case of young people aged 12-15 years. To engage teenagers in the  
33  
34 process, a clinic appointment was offered for them to attend with their parent/carer. The session  
35  
36 was designed around talking to the young person, finding out the difficulties from their perspective,  
37  
38 talking through their needs and the barriers to good sleep, with reference to some basic sleep  
39  
40 science. The teenagers were empowered to develop their own sleep programme with the  
41  
42 practitioner supporting them to devise their own solutions. A bespoke programme with a generic  
43  
44 sleep information pack was given to each individual participant.  
45  
46  
47  
48  
49

#### 50 Primary Goal

51  
52 Parents were asked to set a goal for the intervention outcome, for example to settle more quickly or  
53  
54 to sleep through the night without waking. Parents selected these themselves. Some parents had  
55  
56 two or more goals. The parents were asked to pick a score from a number 1-10 on a chart for each of  
57  
58 their goals (Figure 1: Goal progress chart) and this score was recorded at baseline and at every  
59  
60

1  
2  
3 contact throughout the intervention period. The Goal progress chart was used to demonstrate  
4  
5 improvement in order to motivate and reassure the parents. Following conclusion of the  
6  
7 intervention the parents' self-selected scores at baseline and at conclusion were compared.  
8  
9

### 10 11 12 Follow-up support

13  
14 Follow-up support for parents and young people was in the form of telephone calls, texts or email  
15  
16 contact according to the individual's preference, for as long as was needed to achieve the  
17  
18 parent/young person's goal or to reach a level that was considered to be a successful or unsuccessful  
19  
20 intervention by the parent/young person and practitioner.  
21  
22

### 23 24 25 Evaluation

26  
27 An independent research team carried out home visits at baseline and one month following the  
28  
29 sleep intervention programme to measure the impact of the sleep problems on the child and family,  
30  
31 and to obtain written informed consent.  
32  
33

34  
35 Outcome measures evaluated were:  
36  
37

- 38  
39 • Strength & Difficulties Questionnaire (SDQ) for parent/carer, teacher and self-assessment  
40  
41 (children aged 11-15 years)
- 42  
43 • Warwick-Edinburgh Mental Well-being Scale (WEMWBS) to measure impact on parent/carer  
44  
45 mental wellbeing. The scale measures 14 aspects of positive mental health including feeling  
46  
47 relaxed, thinking clearly, feeling confident and cheerful.
- 48  
49 • Self-designed questionnaires to measure:  
50  
51 ○ the child's sleep pattern, based on parental recollection, including time taken to  
52  
53 settle, time taken to fall to sleep, number of nights per week the child woke in the  
54  
55 night, number of awakenings per night, duration of nocturnal awakenings and total  
56  
57 sleep duration per night (Supplementary file 1).  
58  
59  
60



- Parent/carer wellbeing – a rating of the impact on quality of life in the previous 2 weeks of a series of factors rated 1-5 (Supplementary file 2).
- days missed from school; days missed from work in the previous 2 weeks
- health of parents and child and visits to healthcare and non-healthcare professionals (HCP) in the previous 2 weeks.

Feedback on the intervention itself (including negative feedback) was also assessed at the follow-up evaluation using a self-designed questionnaire.

### Statistics

A sample size calculation was not carried out due to the pilot study design. The recruitment numbers were dependent on the number of workshops and clinics feasible to provide during the funded study period of 10 months.

Participants that withdrew from the study were taken into account in the analysis by imputing values for the final outcome measure carried forward from the baseline evaluation. In addition, a per protocol analysis of the patients that completed the intervention and evaluation was carried out. For comparison of scores from baseline to post-intervention, mean differences, standard deviations, 95% confidence intervals and 2-tailed t-tests were calculated using Excel.

### Development of Implementation Model

The proposed implementation model was developed through a strategic group which included the core team, service managers from the 0-19 health service and Local Authority parenting service, medical and pharmacy advisors from Sheffield CCG, SCH Trust, Looked After and adoption services, the Sheffield parent carer forum and Children's Residential Homes. The findings and proposed model were presented to the Children's Health and Wellbeing Transformation Board, the Executive

1  
2  
3 Director of People Services Portfolio (Children's & Adults), and the elected member for Children and  
4  
5 Young People.  
6  
7  
8  
9

10 Both NHS and Local Authority ethics approvals and a formal Data sharing agreement were obtained  
11  
12 (REC reference 16/YH/0490).  
13  
14  
15  
16  
17  
18  
19  
20  
21  
22  
23  
24  
25  
26  
27  
28  
29  
30  
31  
32  
33  
34  
35  
36  
37  
38  
39  
40  
41  
42  
43  
44  
45  
46  
47  
48  
49  
50  
51  
52  
53  
54  
55  
56  
57  
58  
59  
60

## Results

Seventy-three eligible participants were approached. Seventeen of these potential participants were identified by front-line staff as eligible but did not want to engage with the project. Reasons given for not consenting were: young person did not wish to take part, moved house recently, recent medication changes meant sleep no longer an issue, illness, parent working shifts or no reason given.

Fifty-six patients were recruited to the study (median age 8.7 years; range 1.8-15.7 years; 45 males: 11 females). Forty-two had ADHD, 7 were adopted, 4 lived in residential homes and 3 were in foster care. Figure 2 outlines the reasons for withdrawal from the study. The overall withdrawal rate was 30%. Eleven participants completed the baseline evaluation but did not attend the sleep support intervention. Reasons given were: too busy, could not travel into the city centre for the intervention, recent medication changes meant sleep no longer an issue, severe escalation of the child's mental health problems. All 45 participants that started the intervention completed it. Six participants dropped out after completing the intervention and did not complete the follow-up evaluation. One carer was not able to follow the bedtime routine and so dropped out of the project. The other five families disengaged without giving a reason. Ten out of the 17 families that withdrew had a lone parent. Thirty-nine participants completed the final evaluation (median age 8.6 years; range 1.8-15.7 years; 31 males: 8 females). Of those that completed, 18 attended a workshop and 21 attended a 1:1 clinic. Twelve of this group had a lone parent; 29 children had ADHD, 5 were adopted, 3 lived in residential homes and 2 were in foster care.

### Primary goal

Primary goal scores were collected from all 45 families that received the intervention. The goals self-selected by parents were grouped into the following themes: to sleep through the night without

wakening (n=4); to self-settle (n=10); to fall asleep more quickly (n=28); stay in their own bed (n=2); to feel less tired in the day (n=1). The median initial score (out of 10) for the parents' primary goal was 0 (range 0-6); the median final score was 7.5 (range 0-10). The mean initial score was 1.1; the mean final score was 6.4. The change in mean goal score was statistically significant (MD 4.10, 95% confidence intervals 3.75-4.42,  $p<0.05$ ).

### Strengths and Difficulties Questionnaires

Fifty-five parents completed the SDQ at baseline, 37 teachers and 8 young people. With missing data imputed from baseline data, none of the measures were significantly changed following the intervention.

### Warwick-Edinburgh Mental Wellbeing Scale

For the overall study group (n=56) with scores imputed from baseline scores for the participants that withdrew from the study, the mean score improved significantly following the intervention from 39.5 to 44.6 (MD 5.16, 95%CI 2.62-7.69,  $p<0.05$ ). For the 39 that completed the intervention and evaluation, the mean score improved significantly following the intervention from 39.0 to 46.8 (MD 8.84, 95%CI 5.32-12.36,  $p<0.05$ ).

### Sleep questionnaire

Table 1 shows the results of the sleep questionnaire. There was no difference in the time taken to fall asleep in the participants that completed compared with those that withdrew from the study (mean time 2.1 hours both groups) or the total sleep time (6.27 hours in the completed group and 6.21 hours in the withdrawals group). All but one of the mean changes from baseline to post-intervention were statistically significant ( $p<0.05$ ). Of those that completed, the average number of extra hours sleep per night was 2.4 hours (range 0.5 hours less to 7.5 hours more sleep per night). Taking into account withdrawals prior to and following the intervention and imputing baseline

scores into the outcome measures, the average number of extra hours sleep was calculated as 1.63 hours.

**Table 1.** Results of the sleep questionnaire.

All participants (n=56)

| Variable                       | Baseline (mean) | Post-intervention (mean) | Mean difference; 95% CI                     |
|--------------------------------|-----------------|--------------------------|---------------------------------------------|
| Time to settle (hrs)           | 2.03            | 1.37                     | MD 0.67; 95% CI 0.25-1.08, p<0.05           |
| Time to fall asleep (hrs)      | 2.1             | 1.1                      | MD 0.99; 95% CI 0.61-1.38, p<0.05           |
| Number of nights wake per week | 4.3             | 2.8                      | MD 1.52; 95% CI 0.71-2.32, p<0.05           |
| Number of awakenings per night | 1.8             | 1.09                     | MD 0.68; 95% CI 0.28-1.08, p<0.05 (n=54)    |
| Duration of awakenings (mins)  | 49.51           | 29.05                    | MD 14.98; 95% CI -6.11-36.08, p=0.18 (n=41) |
| Number of hours sleep (hrs)    | 6.25            | 7.88                     | MD 1.63; 95% CI 1.04-2.23; p<0.05           |

Participants that completed (n=39)

| Variable                       | Baseline (mean) | Post-intervention (mean) | Mean difference; 95% CI            |
|--------------------------------|-----------------|--------------------------|------------------------------------|
| Time to settle (hrs)           | 1.76            | 0.81                     | MD 0.95; 95% CI 0.5-1.4, p<0.05    |
| Time to fall asleep (hrs)      | 2.1             | 0.67                     | MD 0.79; 95% CI 0.6-0.98, p<0.05   |
| Number of nights wake per week | 4.0             | 1.87                     | MD 2.18; 95% CI 0.55-2.36, p<0.05  |
| Number of awakenings per night | 1.54            | 0.58                     | MD 0.97; 95% CI 0.43-1.39, p<0.05  |
| Duration of awakenings (mins)  | 33.59           | 10.55                    | MD 23.31; 95% CI 7.65-35.6, p<0.05 |
| Number of hours sleep (hrs)    | 6.27            | 8.62                     | MD 2.35; 95% CI 1.64-3.06; p<0.05  |

Parent/Carer Wellbeing

1  
2  
3 When asked about the impacts on parental wellbeing of the child's sleep problem, 50/56 primary  
4 respondents were the mother, 3/56 were care-workers and 3/56 were foster carers. All wellbeing  
5 scores improved following the intervention and all but two reached statistical significance (Figure 3).  
6  
7  
8  
9

10  
11  
12 Days missed from school reduced from 20.9 to 18.5; number of days missed from work reduced  
13 from 9.2 to 0. Number of visits to HCP and non-HCP reduced by 4 and 23 respectively. There were  
14 fewer reported illnesses in parents/carers (headaches, anxiety, depression and general tiredness)  
15 and in children (viral illnesses and colds). None of these measures of the wider impacts of the sleep  
16 intervention reached statistical significance but all showed improvement.  
17  
18  
19  
20  
21  
22  
23  
24

#### 25 Parent/carer feedback

26  
27 Of the 39 parent/carers that responded following the intervention, 31 felt the intervention had  
28 helped their child, 33 reported that the intervention had helped their role as a parent or carer and  
29  
30  
31  
32  
33 32 believed the intervention helped other children in the household.

34  
35 Some parents felt that behaviour was unchanged and that the child still could not switch off at  
36 bedtime. However, the majority of comments at the final visit were positive, noting improvements  
37 at school, "no more battles", the ability to start new activities and go on holiday, improved energy,  
38 confidence and relationships. 100% parents/carers said that they would recommend the  
39 programme, even if it had not been successful for their child. The key enabling factor in the parental  
40 feedback was the regular telephone support.  
41  
42  
43  
44  
45  
46  
47  
48  
49  
50  
51  
52

#### 53 Implementation model

54  
55 The implementation model (figure 4) was developed using a whole systems/whole population  
56 approach looking at complexity of need against breadth of reach, ranging from awareness raising  
57  
58  
59  
60

1  
2  
3 and promotion, through universal settings, targeted support for complex situations to specialist  
4 support. The final step in the referral pathway is the Sheffield Children's Hospital Clinic.  
5  
6  
7  
8  
9

10 Where sleep interventions are delivered, the model is mainly based upon a hub and spoke model,  
11 with existing staff taking on sleep as part of their role and Sleep Practitioner leads (either  
12 geographically or within specific service areas) driving and supporting implementation.  
13  
14  
15  
16  
17

18 By building capacity into the workforce, members of staff have been trained as sleep practitioners  
19 across the key services: Parenting, Health visiting, Inclusion, SEND, Children's Residential Homes. All  
20 early help staff have been given awareness training and staff trained in 24 Schools.  
21  
22  
23  
24  
25  
26  
27  
28  
29  
30  
31  
32  
33  
34  
35  
36  
37  
38  
39  
40  
41  
42  
43  
44  
45  
46  
47  
48  
49  
50  
51  
52  
53  
54  
55  
56  
57  
58  
59  
60

## Discussion

The key findings from this evaluation were that, with an individual sleep programme and support from a sleep practitioner, children's total sleep time and parent/carer mental wellbeing were significantly improved. In addition, parents' confidence in their ability to achieve their goals, healthcare utilisation, illnesses and medication use were also improved. Through partnership working a local integrated model of sleep support delivery has been established.

The finding that a behavioural intervention for sleep support is effective is not novel. Previous projects have shown efficacy of behavioural sleep support delivered both by the third sector and in healthcare settings<sup>12-14</sup>. Our study has shown that delivery and implementation of sleep support within existing local services is feasible for groups of vulnerable children in the community. We have shown that empowering parents to implement consistent sleep routines at home, giving them a sense of achievement, as well as more sleep, led to a significant improvement in mental wellbeing.

The support offered by the practitioners is a complex package of care using a whole systems approach. This package has not been formally described in terms of a behaviour change model and future research to explore this further would be beneficial to understanding the most effective elements of the intervention package. Our observation was that the effectiveness of the one to one clinic model and the group workshop were equivalent, but that parent's preferences differed. The key aspect of the delivery model that parents consistently reported to be the most effective was the follow up support in the form of phone calls or emails.

There was a 30% withdrawal rate from our study with 11/56 participants unable to proceed with the intervention. Despite this, all participants that started the intervention did complete it and only 6/56 were lost to follow-up. The baseline characteristics of the children whose parent/carer withdrew were the same as those that completed the intervention and evaluation in terms of gender, age, underlying diagnosis or residential placement. The only difference noted was that 10/17 families



1  
2  
3 that withdrew had a lone parent and 12/39 of the group that completed had a lone parent. This  
4  
5 factor may have impaired their ability to engage and should be highlighted for particular support in  
6  
7 future implementation of this intervention. Reasons for withdrawal cited by the families were  
8  
9 generally practical, including house moves, mental illness and changes to medication. In a real-life  
10  
11 setting these factors would have been noted and support offered to parents at a later date,  
12  
13 however, given the time constraints of a research study it was not possible to include these families  
14  
15 further in this project.  
16  
17  
18  
19  
20

21 Caution is needed when interpreting the results of this uncontrolled before and after study. Without  
22  
23 a concurrent control group it cannot be assumed that observed changes were directly due to the  
24  
25 intervention. Whilst the changes may have been influenced by other interventions introduced at the  
26  
27 time of the study, it is likely however that the sleep intervention did have significant results in these  
28  
29 children with severe long-term sleep problems.  
30  
31  
32  
33

34 Due to the withdrawal rate two analyses were carried out. A per protocol analysis was carried out on  
35  
36 those participants that completed the intervention and provided data on the outcome measures.  
37  
38 We recognise however that this analysis results in an over-representation and represents the  
39  
40 maximum potential or “best case” results. Analysis taking into account withdrawals was therefore  
41  
42 also carried out based on the assumption that baseline data would remain unchanged without the  
43  
44 intervention and using imputed values for the final outcome measure by carrying forward the  
45  
46 baseline value for research participants lost to follow- up. These results represent the “worst case”  
47  
48 and an under-representation of the outcomes because the 11 participants that had received the  
49  
50 intervention and were likely to have improved from baseline. In reality, the outcomes that truly  
51  
52 reflect the intervention are likely to lie between those generated by the two analysis methods.  
53  
54  
55  
56  
57  
58  
59  
60

1  
2  
3 One of the enabling factors for the project was the partnership between the Children's Hospital  
4 Trust, the City Council and The Children's Sleep Charity (TCSC). The integrated working across local  
5 authority, health, and third sector brought together providers and commissioners with expertise in  
6 strategic planning, research and sleep. The Sleep Practitioners' experience in parenting and  
7 education enabled them to understand complex situations over and above the sleep difficulties  
8 which were fundamental to addressing some of the complex situations that arose. Challenges faced  
9 by the joint initiative included the requirement to submit the project to both NHS and local authority  
10 governance frameworks. Aligning this process and different organisational cultures and  
11 expectations was more challenging than anticipated. However, the partnership working opened  
12 doors and opportunities that otherwise would not be available, ultimately leading to better  
13 provision for families.  
14  
15  
16  
17  
18  
19  
20  
21  
22  
23  
24  
25  
26  
27  
28  
29

30 The proposed implementation model was designed to address the concepts of whole family working  
31 to connect parenting, health and wellbeing with sleep and to create accessible support for all  
32 families. There remain a number of resource gaps which include continued workforce training,  
33 support networks, awareness raising and signposting to services and resources, expansion into other  
34 services including primary care, co-ordination and triage, implementation and mentorship materials  
35 for school, accessible information on-line and further evidence gathering and research.  
36  
37  
38  
39  
40  
41  
42  
43  
44  
45

46 We suggest that this relatively inexpensive approach can be implemented in local authority services  
47 by integration into the existing workforce. We would recommend that staff training in sleep support  
48 and early intervention using an integrated cross-agency model would benefit children and their  
49 parents and save NHS healthcare costs by addressing issues as a first-line intervention before  
50 escalation to more specialist services.  
51  
52  
53  
54  
55  
56  
57  
58  
59  
60

1  
2  
3  
4 **Acknowledgement:** We would like to thank the children and their families and carers for taking part  
5  
6 in the project. We would also like to thank the Ryegate Children's centre, CAMHS, MAST and SEND  
7  
8 services for their support throughout the project.  
9  
10

### 11 12 13 **Funding Statement**

14  
15 This work was supported by The Health Foundation grant ref 3042  
16  
17

### 18 19 **Competing Interests Statement**

20  
21 No conflicts of interest to declare.  
22  
23

### 24 25 **Contributorship Statement**

26  
27 All authors were involved in the planning and reporting of the study, all authors have reviewed the  
28  
29 final manuscript.  
30

31  
32 HE led the study, supervised the research team, led the NHS strategic planning, analysed the results  
33  
34 and wrote the main body of the report.  
35

36  
37 CL and LH led the Local Authority strategic planning and supervised the sleep practitioners.  
38

39  
40 SS and AI delivered the sleep practitioner intervention  
41

42  
43 VD trained and supervised the sleep practitioners and led the charity strategic planning  
44

45  
46 RK and JR delivered the evaluations, data collection and recording.  
47  
48  
49  
50  
51  
52  
53  
54  
55  
56  
57  
58  
59  
60

1  
2  
3 **“What is already known on this topic”**  
4

- 5 1. Sleep deprivation due to behavioural insomnia has an impact on physical, mental and  
6 emotional health and wellbeing for the child and family.  
7  
8  
9  
10 2. Intensive sleep support interventions are effective but access to support is patchy and, in  
11 most areas, offered only by the voluntary sector.  
12  
13  
14 3. Integrated multiagency working is an NHS priority area.  
15  
16  
17  
18  
19

20 **“What this study adds”**  
21

- 22 4. Cross-agency sleep support delivered via an integrated delivery model has shown efficacy  
23 and can be implemented by integration into the existing workforce.  
24  
25  
26 5. Using this approach, an average of an extra 2.4 hours of sleep per night was achieved as well  
27 as a significant improvement in parent/carer wellbeing.  
28  
29  
30  
31 6. Key to achieving success with the intervention was the use of follow-up motivational  
32 telephone support.  
33  
34  
35  
36  
37  
38  
39  
40  
41  
42  
43  
44  
45  
46  
47  
48  
49  
50  
51  
52  
53  
54  
55  
56  
57  
58  
59  
60

## References

1. Walker M. *Why We Sleep: The New Science of Sleep and Dreams*. 2018. Allen Lane; 01 edition ISBN-13: 978-0241269060
2. American Academy of Sleep Medicine. 2005. *International Classification of Sleep Disorders, 2nd ed.: Diagnostic and coding manual* Westchester, IL: Author.
3. Wiggs L Behavioural aspects of children's sleep. *Arch Dis Child*. 2009 Jan;94(1):59-62. doi: 10.1136/adc.2007.125278. Epub 2008 Oct 31.
4. Melzer LJ. Clinical management of behavioral insomnia of childhood: treatment of bedtime problems and night wakings in young children. *Behav Sleep Med*. 2010;8(3):172-89. doi: 10.1080/15402002.2010.487464.
5. Simola P, Liukkonen K, Pitkäranta A, Pirinen T, Aronen ET. Psychosocial and somatic outcomes of sleep problems in children: a 4-year follow-up study. *Child Care Health Dev*. 2014 Jan;40(1):60-7. doi: 10.1111/j.1365-2214.2012.01412.x.
6. Dewald JF, Meijer AM, Oort FJ, Kerkhof GA, Bögels SM. The influence of sleep quality, sleep duration and sleepiness on school performance in children and adolescents: A meta-analytic review. *Sleep Med Rev*. 2010 (3):179-89;
7. Montgomery P, Wiggs L. Definitions of sleeplessness in children with attention-deficit hyperactivity disorder (ADHD): implications for mothers' mental state, daytime sleepiness and sleep-related cognitions. *Child Care Health Dev*. 2015 Jan;41(1):139-46. doi: 10.1111/cch.12165. Epub 2014 Jun 12.
8. Doo S, Wing YK. Sleep problems of children with pervasive developmental disorders: correlation with parental stress. *Dev Med Child Neurol*. 2006 Aug;48(8):650-5.
9. Tietze A, Zernikow B, Michel E, Blankenburg M. Sleep disturbances in children, adolescents, and young adults with severe psychomotor impairment: impact on parental quality of life and sleep *Developmental Medicine & Child Neurology* 2014, 56: 1187–1193

- 1  
2  
3  
4  
5  
6  
7  
8  
9  
10  
11  
12  
13  
14  
15  
16  
17  
18  
19  
20  
21  
22  
23  
24  
25  
26  
27  
28  
29  
30  
31  
32  
33  
34  
35  
36  
37  
38  
39  
40  
41  
42  
43  
44  
45  
46  
47  
48  
49  
50  
51  
52  
53  
54  
55  
56  
57  
58  
59  
60
10. Katie Turner, Lydia Bullock, Amy Down, Katie Brown, Karon Foulkes, Louise Thomson Sleep Tight: An evaluation of a community-based intervention on the sleep behaviours of young children *Journal of Health Visiting* › November 2016 › Volume 4 Issue 11  
Turner K, Bullock L, Down A, Brown K, Foulkes K, Thomson L. *Journal of Health Visiting* › November 2016 › Volume 4 Issue 11:572-578.
  11. Quine L. Sleep problems in children with mental handicap. *J Mental Defic Res* 1991;35:269-90.
  12. Scantlebury A, McDaid C, Dawson V, Elphick H, Fairhurst C, Hewitt C, Parker A, Spiers G, Thomas M, Wright K, Beresford B. Non-pharmacological interventions for non-respiratory sleep disturbance in children with neurodisabilities: a systematic review. *Developmental Medicine and Child Neurology* 2018.
  13. Keshavarzi Z, Bajoghli H, Mohamadi MR, et al. In a randomized case-control trial with 10-years olds suffering from attention deficit/hyperactivity disorder (ADHD) sleep and psychological functioning improved during a 12-week sleep-training program. *World J BiolPsychiatry* 2014;15:609–19.
  14. Corkum P, Lingley-Pottie P, Davidson F, et al. Better nights/better days—distance intervention for insomnia in school-aged children with/without ADHD: a randomized controlled trial. *J Pediatr Psychol* 2016;41:1–13 <http://dx.doi.org/10.1093/jpepsy/jsw1031>

## Figure Legends

### Figure 1. Goal progress chart

Parent/carers were asked to suggest a goal to work towards and to score their impression of their current achievement of that goal at each contact with the sleep practitioner by circling their chosen number on the chart. The progress documented on the chart served as a motivational tool.

### Figure 2. Project flowchart.

Thirty-four participants either did not respond to initial contact from the sleep practitioners or disengaged. 10 participants failed to attend or cancelled the workshop or clinic appointments after the baseline visit. After completing the workshop or clinic, one family did not respond to contacts for arranging the final visit and 5 families disengaged without giving a reason. 39 participants completed the final evaluation.

Figure 3. Parent/carer wellbeing scores pre- and post-intervention. Scores were on a scale of 1-5, with 1 being none of the time and 5 being all of the time, ie a low score indicated good quality of life and a high score indicated poor quality of life. \* represents  $p < 0.05$ .

Figure 4. The proposed implementation model for cross-agency delivery of sleep support services

### Multi-Agency Support Team - Goal Progress Chart

Name \_\_\_\_\_

|              |
|--------------|
| <b>GOAL:</b> |
|--------------|

Who agreed this Goal (child, parent, worker): \_\_\_\_\_

| Session                                                                                                                                                                                      | Date | Today I would rate progress to this goal:<br>(Please circle the appropriate number below) |   |   |   |   |   |   |   |   |   |    |
|----------------------------------------------------------------------------------------------------------------------------------------------------------------------------------------------|------|-------------------------------------------------------------------------------------------|---|---|---|---|---|---|---|---|---|----|
| <i>Remember a score of zero means no progress has been made towards a goal, a score of ten means a goal has been reached fully, and a score of five is exactly half way between the two.</i> |      |                                                                                           |   |   |   |   |   |   |   |   |   |    |
| 1                                                                                                                                                                                            |      | 0                                                                                         | 1 | 2 | 3 | 4 | 5 | 6 | 7 | 8 | 9 | 10 |
| 2                                                                                                                                                                                            |      | 0                                                                                         | 1 | 2 | 3 | 4 | 5 | 6 | 7 | 8 | 9 | 10 |
| 3                                                                                                                                                                                            |      | 0                                                                                         | 1 | 2 | 3 | 4 | 5 | 6 | 7 | 8 | 9 | 10 |
| 4                                                                                                                                                                                            |      | 0                                                                                         | 1 | 2 | 3 | 4 | 5 | 6 | 7 | 8 | 9 | 10 |
| 5                                                                                                                                                                                            |      | 0                                                                                         | 1 | 2 | 3 | 4 | 5 | 6 | 7 | 8 | 9 | 10 |
| 6                                                                                                                                                                                            |      | 0                                                                                         | 1 | 2 | 3 | 4 | 5 | 6 | 7 | 8 | 9 | 10 |
| 7                                                                                                                                                                                            |      | 0                                                                                         | 1 | 2 | 3 | 4 | 5 | 6 | 7 | 8 | 9 | 10 |
| 8                                                                                                                                                                                            |      | 0                                                                                         | 1 | 2 | 3 | 4 | 5 | 6 | 7 | 8 | 9 | 10 |
| 9                                                                                                                                                                                            |      | 0                                                                                         | 1 | 2 | 3 | 4 | 5 | 6 | 7 | 8 | 9 | 10 |
| 10                                                                                                                                                                                           |      | 0                                                                                         | 1 | 2 | 3 | 4 | 5 | 6 | 7 | 8 | 9 | 10 |
| 11                                                                                                                                                                                           |      | 0                                                                                         | 1 | 2 | 3 | 4 | 5 | 6 | 7 | 8 | 9 | 10 |
| 12                                                                                                                                                                                           |      | 0                                                                                         | 1 | 2 | 3 | 4 | 5 | 6 | 7 | 8 | 9 | 10 |



1  
2  
3  
4  
5  
6  
7  
8  
9  
10  
11  
12  
13  
14  
15  
16  
17  
18  
19  
20  
21  
22  
23  
24  
25  
26  
27  
28  
29  
30  
31  
32  
33  
34  
35  
36  
37  
38  
39  
40  
41  
42  
43  
44  
45  
46  
47  
48  
49  
50  
51  
52  
53  
54  
55  
56  
57  
58  
59  
60

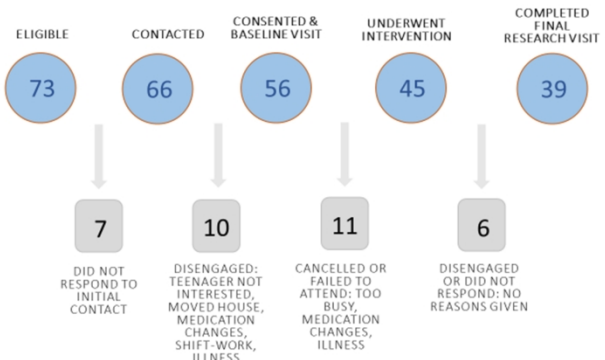

210x296mm (300 x 300 DPI)

1  
2  
3  
4  
5  
6  
7  
8  
9  
10  
11  
12  
13  
14  
15  
16  
17  
18  
19  
20  
21  
22  
23  
24  
25  
26  
27  
28  
29  
30  
31  
32  
33  
34  
35  
36  
37  
38  
39  
40  
41  
42  
43  
44  
45  
46  
47  
48  
49  
50  
51  
52  
53  
54  
55  
56  
57  
58  
59  
60

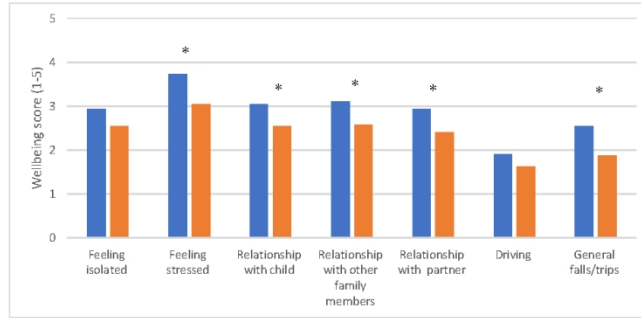

209x297mm (150 x 150 DPI)

1  
2  
3  
4  
5  
6  
7  
8  
9  
10  
11  
12  
13  
14  
15  
16  
17  
18  
19  
20  
21  
22  
23  
24  
25  
26  
27  
28  
29  
30  
31  
32  
33  
34  
35  
36  
37  
38  
39  
40  
41  
42  
43  
44  
45  
46  
47  
48  
49  
50  
51  
52  
53  
54  
55  
56  
57  
58  
59  
60

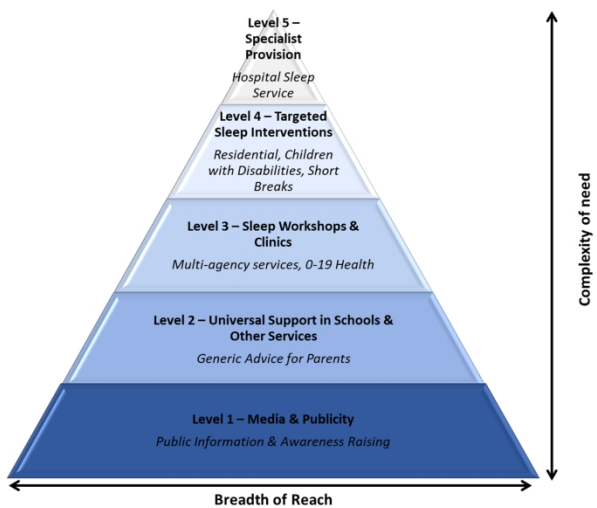

210x296mm (300 x 300 DPI)

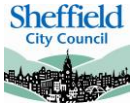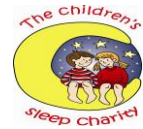

## Sheffield Children and Young People Sleeping Well Research Project

### Your Child's Sleep Pattern Questions

*In this research project, the term 'your child' refers to the child in your care for which you have a concern about their sleep.*

Study ID: \_\_\_\_\_

Baseline Evaluation  Intermediate Evaluation  Follow-up Evaluation

Completed by: Parent/Carer

1. What time does your child usually go up to bed?
2. What time does your child usually settle down to try and sleep?
3. How long does it take for your child to usually fall asleep?
4. How many nights a week does your child usually wake?
5. How many times a night do they usually wake?
6. How long are they usually awake for?
7. Do you usually get up to them?
8. Overall, how many hours sleep does your child usually get a night?
9. What time do they finally wake in the morning?
10. Do they need to be woken up?
11. What is their mood on waking?

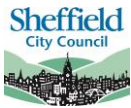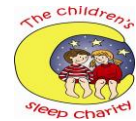

## Sheffield Children and Young People Sleeping Well Research Project

Study ID: \_\_\_\_\_ Completed by: Parent/Carer

Baseline Evaluation  Intermediate Evaluation  Follow-up Evaluation

### Impact on Wellbeing and Quality of Life Adult Participant

*In this project, the term 'your child' refers to the child in your care for which you have a concern about their sleep.*

**Parent / Carer 1:**

|     |                                                                                                                                                                                                                |                                                             |
|-----|----------------------------------------------------------------------------------------------------------------------------------------------------------------------------------------------------------------|-------------------------------------------------------------|
| 1.1 | The number of days missed from work in the past two weeks due to the sleep difficulties                                                                                                                        |                                                             |
| 1.2 | Have you visited a Healthcare Professional in the past two weeks (e.g. Health Visitors / GP / A&E)                                                                                                             | Yes <input type="checkbox"/><br>No <input type="checkbox"/> |
| 1.3 | If yes, which healthcare professionals and how many visits in the past two weeks                                                                                                                               | .....<br>.....<br>.....<br>.....                            |
| 1.4 | Have you had any periods of ill health in the past two weeks? Please explain:                                                                                                                                  |                                                             |
| 1.5 | Are you currently using any medications: Name/type and level of medication                                                                                                                                     |                                                             |
| 1.6 | Have you made any changes to your work patterns (e.g. different shifts / reduced hours / change of job ) because of the sleep difficulties in the past two weeks?                                              |                                                             |
| 1.7 | Have you contacted any non-health care professionals in the past two weeks (e.g. Teacher, MAST workers, support workers, Supervising Social Workers) about any issues related to your child's sleep difficulty | Yes <input type="checkbox"/><br>No <input type="checkbox"/> |
| 1.8 | If yes, which non-healthcare professional and the number of contacts in the past two weeks                                                                                                                     | .....<br>.....<br>.....<br>.....                            |

## Sheffield Children and Young People Sleeping Well Research Project

**On a Scale of 1-5: 1 being 'None of the Time' and 5 being 'All of the Time'**  
**Over the past two weeks how do you feel your child's sleep disturbance has impacted on your quality of life?**

|      | Statement                                                                           | None of the time | Rarely | Some of the time | Often | All of the time |
|------|-------------------------------------------------------------------------------------|------------------|--------|------------------|-------|-----------------|
| 1.9  | It makes me feel isolated                                                           | 1                | 2      | 3                | 4     | 5               |
| 1.10 | It makes me feel stressed                                                           | 1                | 2      | 3                | 4     | 5               |
| 1.11 | It is impacting on my relationship with my child (with the sleep disturbance)       | 1                | 2      | 3                | 4     | 5               |
| 1.12 | It is impacting on my relationship with other family members                        | 1                | 2      | 3                | 4     | 5               |
| 1.13 | It is impacting on my relationship with my spouse/partner                           | 1                | 2      | 3                | 4     | 5               |
| 1.14 | It is impacting on my ability to drive, or drive safely with due care and attention | 1                | 2      | 3                | 4     | 5               |
| 1.15 | It is impacting on the number of general trips, bumps and accidents (not driving)   | 1                | 2      | 3                | 4     | 5               |

# BMJ Paediatrics Open

## Pilot Study of an Integrated Model of Sleep Support for Children: A Before and After Evaluation

|                               |                                                                                                                                                                                                                                                                                                                                                                                                                                                                                    |
|-------------------------------|------------------------------------------------------------------------------------------------------------------------------------------------------------------------------------------------------------------------------------------------------------------------------------------------------------------------------------------------------------------------------------------------------------------------------------------------------------------------------------|
| Journal:                      | <i>BMJ Paediatrics Open</i>                                                                                                                                                                                                                                                                                                                                                                                                                                                        |
| Manuscript ID                 | bmjpo-2019-000551.R1                                                                                                                                                                                                                                                                                                                                                                                                                                                               |
| Article Type:                 | Original research                                                                                                                                                                                                                                                                                                                                                                                                                                                                  |
| Date Submitted by the Author: | 02-Oct-2019                                                                                                                                                                                                                                                                                                                                                                                                                                                                        |
| Complete List of Authors:     | Elphick, Heather; Sheffield Children's Hospital, Department of Respiratory Medicine<br>Lawson, Candi; Sheffield City Council<br>Ives, Ann; Sheffield City Council<br>Siddall, Sue; Sheffield City Council<br>Kingshott, Ruth; Sheffield Children's Hospital, Paediatric Respiratory Department.<br>Reynolds, Janine; Sheffield Children's Hospital, Department of Respiratory Medicine<br>Dawson, Victoria; The Children's Sleep Charity<br>Hall, Lorraine; Sheffield City Council |
| Keywords:                     | Sleep                                                                                                                                                                                                                                                                                                                                                                                                                                                                              |
|                               |                                                                                                                                                                                                                                                                                                                                                                                                                                                                                    |

SCHOLARONE™  
Manuscripts

# Pilot Study of an Integrated Model of Sleep Support for Children: A Before and After Evaluation

Heather E Elphick\*, Candi Lawson, Ann Ives, Sue Siddall, Ruth N Kingshott, Janine Reynolds, Victoria Dawson, Lorraine Hall.

Sleep Service, Sheffield Children's NHS Foundation Trust, UK

Commissioning, Inclusion and Learning Service, Sheffield City Council, UK

The Children's Sleep Charity, UK

\*Corresponding author

Professor Heather Elphick

Sheffield Children's Hospital

Western Bank

Sheffield

S10 2TH

0114 2717400

[heather.elphick@sch.nhs.uk](mailto:heather.elphick@sch.nhs.uk)

Keywords: Sleep, Children, Behavioural Intervention, Implementation

Word count: 3266



## Abstract

**Objective:** Despite the success of behavioural sleep support interventions in the third sector, sleep support is not universally available for families in the UK. The aim of the study was to provide evidence of efficacy and to propose a delivery model for integrated sleep support for families of vulnerable children.

**Design and setting:** A sleep support intervention was carried out in Sheffield Local Authority evaluated using a pre- and post-intervention study design by Sheffield Children's NHS Trust.

**Participants:** Fifty-six children aged 6-16 years with significant sleep problems were recruited; 39 completed the intervention and evaluation.

**Interventions:** Basic sleep education and an individualised programme was delivered by a sleep practitioner. Follow-on telephone support was provided to empower the parent (and/or young person) to carry out the sleep programme at home. An integrated NHS and Local Authority delivery model was designed and implemented.

**Results:** Parents' ratings of their child's ability to self-settle improved from 1.1/10 to 6.4/10 ( $p < 0.05$ ). Mean Warwick-Edinburgh Mental Wellbeing Scale scores improved significantly for parents/carers (MD 4.10, 95% confidence intervals 3.75-4.42,  $p < 0.05$ ). Children that completed the intervention gained on average an extra 2.4 hours sleep a night. There was reduction in healthcare utilisation, illnesses and medication use.

**Conclusions:** The behavioural approach to sleep support for these vulnerable groups of children is highly effective. Follow-on individual support to empower parents is key to achieving success. Sleep support can be implemented in NHS and Local Authority services by integration into the existing workforce using a cross-agency model.

**Word count 246**

## Introduction

Sleep is a restorative process, fundamental to physical and psychological health<sup>1</sup>. Approximately 30% of young children experience sleep difficulties in the form of bedtime resistance and night time waking; termed as behavioural insomnia<sup>2</sup>. These difficulties can arise from the way parents manage their child's sleep<sup>3</sup> and can be effectively treated with a behavioural approach<sup>4</sup>.

The impact of sleep disturbance on children's health is wide-ranging including difficulties with mood, psychosocial problems and a detrimental impact on the child's cognitive ability and learning<sup>5,6</sup>.

Parents of children with sleep difficulties can suffer high levels of stress and anxiety, decreased ability to work or to drive safely, relationship and financial problems<sup>7,8,9</sup>. These stresses lead to an increased demand on NHS primary care services and to prescriptions of drugs such as antidepressants.

Evidence from sleep clinics delivered in the voluntary sector has shown that an intensive behavioural intervention can be highly effective<sup>10</sup>. However, recognition of sleep deprivation as a factor in psychosocial morbidity has not been an NHS priority and resources are scarce.

A partnership comprising Sheffield Children's NHS Trust (SCH), Sheffield City Council (SCC) and The Children's Sleep Charity (TCSC) carried out and evaluated an intensive behavioural intervention delivered by community practitioners to provide support to parent/carers and young people to improve sleep patterns for vulnerable children (The Sheffield Children and Young People Sleeping Well Project). A proposed integrated delivery model was developed and has begun to be implemented to provide cross-agency sleep support within the city.

## Methods

The study design was an observational pre- and post- evaluation of a behavioural sleep intervention in the form of a workshop or clinic appointment with follow-up support. A control group was not included.

### Patient Involvement

Members of the Sheffield parent carer forum were involved in the concept and development of the study. Two parent/carers sat on the strategic committee which discussed strategies for gathering evidence and implementation of city-wide services.

### Recruitment

Children and young people aged 6-16 years known to have a sleep problem and with either with ADHD or Looked After/adopted children (LAAC) were selected as being two groups of children highlighted by service managers as being vulnerable and therefore priority groups for intervention. Participants were selected sequentially on referral from an ADHD clinician or key worker dealing with LAAC who felt that the child/family would benefit from the intervention. Participants were not known to sleep practitioners or the research team before referral to the project and only had contact for the duration of the project. Children with a Composite Sleep Disturbance Index<sup>11</sup> score of 3 or more, indicating significant problems with settling to sleep and/or waking at night were eligible for inclusion. Inclusion criteria were checked by the research team prior to recruitment. Children with a specific physiological sleep or medical disorder (for example sleep apnoea, pain, respiratory or gastrointestinal symptoms or seizures) were excluded if it was felt that the sleep disturbance had a medical basis that should be prioritised over the sleep support intervention. This was screened for by the practitioners at initial assessment and discussed with the consultant (HE) as necessary. HE made the final decision as to whether or not the child was included. Children were also excluded if there were factors such as clinical (physical or mental health) or social life-events that would have

1  
2  
3 interfered with the implementation of the sleep intervention within the time-frame of the project.  
4  
5 We therefore did include children with other sleep problems such as sleep walking if it was  
6  
7 considered that the child may still benefit from the sleep support intervention with no other  
8  
9 concerns identified. Those that did not proceed with the study were signposted back into the  
10  
11 appropriate clinical or Local Authority services for further evaluation.  
12  
13  
14  
15  
16  
17  
18

### 19 Intervention

20  
21 Two experienced practitioners with Parenting and Learning Mentor roles within the Local Authority  
22  
23 early intervention team delivered the sleep support interventions over a 10-month period. The  
24  
25 practitioners had previously received accredited sleep practitioner training through TCSC  
26  
27 (www.thechildrenssleepcharity.org.uk). The objective of the intervention was to provide bespoke  
28  
29 support to parents/carers and/or young people, to skill and empower them to implement a  
30  
31 behavioural sleep programme at home to improve their child's/their night-time behaviour with  
32  
33 ongoing support from the practitioners.  
34  
35  
36  
37  
38

39 The intervention was delivered via a 3-hour workshop for 4-6 families or via a 1 to 1 clinic model  
40  
41 (decided on a case by case basis according to age, preference and workshop availability). In both  
42  
43 settings, education about basic sleep physiology was given followed by a one-to-one consultation to  
44  
45 explore possible solutions to sleep problems by developing an individualised sleep programme. The  
46  
47 programme included a consistent routine, removal of technology from the bedroom, hand-eye co-  
48  
49 ordination activities for the hour before bedtime, melatonin-producing supper-time foods,  
50  
51 avoidance of caffeine and changes to the bedroom environment.  
52  
53  
54  
55

56 The delivery was targeted at parents in the case of children aged 1-11 years and at the young person  
57  
58 with or without parents in the case of young people aged 12-15 years. To engage teenagers in the  
59  
60

1  
2  
3 process, a clinic appointment was offered for them to attend with their parent/carer. The session  
4  
5 was designed around talking to the young person, finding out the difficulties from their perspective,  
6  
7 talking through their needs and the barriers to good sleep, with reference to some basic sleep  
8  
9 science. The teenagers were empowered to develop their own sleep programme with the  
10  
11 practitioner supporting them to devise their own solutions. A bespoke programme with a generic  
12  
13 sleep information pack was given to each individual participant.  
14  
15  
16  
17  
18

### 19 Primary Goal

20  
21 Parents were asked to set a goal for the intervention outcome, for example to settle more quickly or  
22  
23 to sleep through the night without waking. Parents selected these themselves. Some parents had  
24  
25 two or more goals. The parents were asked to pick a score from a number 1-10 on a chart for each of  
26  
27 their goals (Figure 1: Goal progress chart) and this score was recorded at baseline and at every  
28  
29 contact throughout the intervention period. The Goal progress chart was used to demonstrate  
30  
31 improvement in order to motivate and reassure the parents. Following conclusion of the  
32  
33 intervention the parents' self-selected scores at baseline and at conclusion were compared.  
34  
35  
36  
37  
38

### 39 Follow-up support

40  
41 Follow-up support for parents and young people was in the form of telephone calls, texts or email  
42  
43 contact according to the individual's preference, for as long as was needed to achieve the  
44  
45 parent/young person's goal or to reach a level that was considered to be a successful or unsuccessful  
46  
47 intervention by the parent/young person and practitioner. This was not pre-defined but was the  
48  
49 point at which no further input from the practitioner was deemed beneficial, ie the primary goal  
50  
51 score was no longer improving.  
52  
53  
54  
55  
56

### 57 Evaluation

1  
2  
3 An independent research team carried out home visits at baseline and one month following the  
4 sleep intervention programme to measure the impact of the sleep problems on the child and family,  
5  
6 and to obtain written informed consent.  
7  
8  
9

10  
11  
12 Outcome measures evaluated were:

- 13  
14 • Strength & Difficulties Questionnaire (SDQ) for parent/carer, teacher and self-assessment  
15 (children aged 11-15 years)
- 16  
17 • Warwick-Edinburgh Mental Well-being Scale (WEMWBS) to measure impact on parent/carer  
18 mental wellbeing. The scale measures 14 aspects of positive mental health including feeling  
19 relaxed, thinking clearly, feeling confident and cheerful.  
20  
21
- 22 • Self-designed questionnaires to measure:  
23
  - 24 ○ the child's sleep pattern, based on parental recollection, including time taken to  
25 settle, time taken to fall to sleep, number of nights per week the child woke in the  
26 night, number of awakenings per night, duration of nocturnal awakenings and total  
27 sleep duration per night (Supplementary file 1).
  - 28 ○ Parent/carer wellbeing – a rating of the impact on quality of life in the previous 2  
29 weeks of a series of factors rated 1-5 (Supplementary file 2).
  - 30 ○ days missed from school; days missed from work in the previous 2 weeks
  - 31 ○ health of parents and child and visits to healthcare and non-healthcare professionals  
32 (HCP) in the previous 2 weeks.  
33  
34  
35  
36  
37  
38  
39  
40  
41  
42  
43  
44  
45  
46  
47  
48  
49

50 Feedback on the intervention itself (including negative feedback) was also assessed at the follow-up  
51 evaluation using a self-designed questionnaire.  
52  
53  
54  
55

## 56 Statistics

57  
58  
59  
60

1  
2  
3 A sample size calculation was not carried out due to the pilot study design. The recruitment numbers  
4  
5 were dependent on the number of workshops and clinics feasible to provide during the funded study  
6  
7 period of 10 months.  
8

9  
10 Participants that withdrew from the study were taken into account in the analysis by imputing  
11  
12 values for the final outcome measure carried forward from the baseline evaluation. In addition, a  
13  
14 per protocol analysis of the patients that completed the intervention and evaluation was carried out.  
15  
16 For comparison of scores from baseline to post-intervention, mean differences, standard deviations,  
17  
18 95% confidence intervals and 2-tailed independent t-tests were calculated using Excel.  
19  
20  
21  
22

### 23 Development of Implementation Model

24  
25 The proposed implementation model was developed through a strategic group which included the  
26  
27 core team, service managers from the 0-19 health service and Local Authority parenting service,  
28  
29 medical and pharmacy advisors from Sheffield CCG, SCH Trust, Looked After and adoption services,  
30  
31 the Sheffield parent carer forum and Children's Residential Homes. The findings and proposed  
32  
33 model were presented to the Children's Health and Wellbeing Transformation Board, the Executive  
34  
35 Director of People Services Portfolio (Children's & Adults), and the elected member for Children and  
36  
37 Young People.  
38  
39  
40  
41  
42

43 Both NHS and Local Authority ethics approvals and a formal Data sharing agreement were obtained  
44  
45 (REC reference 16/YH/0490).  
46  
47  
48  
49  
50  
51  
52  
53  
54  
55  
56  
57  
58  
59  
60

## Results

Seventy-three eligible participants were approached. Seventeen of these potential participants were identified by front-line staff as eligible but did not want to engage with the project. Reasons given for not consenting were: young person did not wish to take part, moved house recently, recent medication changes meant sleep no longer an issue, illness, parent working shifts or no reason given.

Fifty-six patients were recruited to the study (median age 8.7 years; range 1.8-15.7 years; 45 males: 11 females). Forty-two had ADHD, 7 were adopted, 4 lived in residential homes and 3 were in foster care. Figure 2 outlines the reasons for withdrawal from the study. The overall withdrawal rate was 30%. Eleven participants completed the baseline evaluation but did not attend the sleep support intervention. Reasons given were: too busy, could not travel into the city centre for the intervention, recent medication changes meant sleep no longer an issue, severe escalation of the child's mental health problems. All 45 participants that started the intervention completed it (including telephone support). Six participants dropped out between completion of the intervention and the final evaluation. Reasons for this were given as carer unable to continue with the bedtime routine (1) or not given (5). Ten out of the 17 families that withdrew had a lone parent. Thirty-nine participants completed the final evaluation (median age 8.6 years; range 1.8-15.7 years; 31 males: 8 females). Of those that completed, 18 attended a workshop and 21 attended a 1:1 clinic. Twelve of this group had a lone parent; 29 children had ADHD, 5 were adopted, 3 lived in residential homes and 2 were in foster care.

### Primary goal

Primary goal scores were collected from all 45 families that received the intervention. The goals self-selected by parents were grouped into the following themes: to sleep through the night without



wakening (n=4); to self-settle (n=10); to fall asleep more quickly (n=28); stay in their own bed (n=2); to feel less tired in the day (n=1). The median initial score (out of 10) for the parents' primary goal was 0 (range 0-6); the median final score was 7.5 (range 0-10). The mean initial score was 1.1; the mean final score was 6.4. The change in mean goal score was statistically significant (MD 4.10, 95% confidence intervals 3.75-4.42,  $p<0.05$ ).

### Strengths and Difficulties Questionnaires

Fifty-five parents completed the SDQ at baseline, 37 teachers and 8 young people. With missing data imputed from baseline data, none of the measures were significantly changed following the intervention. (Results included in supplementary materials.)

### Warwick-Edinburgh Mental Wellbeing Scale

For the overall study group (n=56) with scores imputed from baseline scores for the participants that withdrew from the study, the mean score improved significantly following the intervention from 39.5 to 44.6 (MD 5.16, 95%CI 2.62-7.69,  $p<0.05$ ). For the 39 that completed the intervention and evaluation, the mean score improved significantly following the intervention from 39.0 to 46.8 (MD 8.84, 95%CI 5.32-12.36,  $p<0.05$ ).

### Sleep questionnaire

Table 1 shows the results of the sleep questionnaire. There was no difference in the time taken to fall asleep in the participants that completed compared with those that withdrew from the study (mean time 2.1 hours both groups) or the total sleep time (6.27 hours in the completed group and 6.21 hours in the withdrawals group). All but one of the mean changes from baseline to post-intervention were statistically significant ( $p<0.05$ ). Of those that completed, the average number of extra hours sleep per night was 2.4 hours (range 0.5 hours less to 7.5 hours more sleep per night). Taking into account withdrawals prior to and following the intervention and imputing baseline

scores into the outcome measures, the average number of extra hours sleep was calculated as 1.63 hours.

**Table 1.** Results of the sleep questionnaire.

All participants (n=56)

| Variable                       | Baseline (mean) | Post-intervention (mean) | Mean difference; 95% CI                     |
|--------------------------------|-----------------|--------------------------|---------------------------------------------|
| Time to settle (hrs)           | 2.03            | 1.37                     | MD 0.67; 95% CI 0.25-1.08, p<0.05           |
| Time to fall asleep (hrs)      | 2.1             | 1.1                      | MD 0.99; 95% CI 0.61-1.38, p<0.05           |
| Number of nights wake per week | 4.3             | 2.8                      | MD 1.52; 95% CI 0.71-2.32, p<0.05           |
| Number of awakenings per night | 1.8             | 1.09                     | MD 0.68; 95% CI 0.28-1.08, p<0.05 (n=54)    |
| Duration of awakenings (mins)  | 49.51           | 29.05                    | MD 14.98; 95% CI -6.11-36.08, p=0.18 (n=41) |
| Number of hours sleep (hrs)    | 6.25            | 7.88                     | MD 1.63; 95% CI 1.04-2.23; p<0.05           |

Participants that completed (n=39)

| Variable                       | Baseline (mean) | Post-intervention (mean) | Mean difference; 95% CI            |
|--------------------------------|-----------------|--------------------------|------------------------------------|
| Time to settle (hrs)           | 1.76            | 0.81                     | MD 0.95; 95% CI 0.5-1.4, p<0.05    |
| Time to fall asleep (hrs)      | 2.1             | 0.67                     | MD 1.43; 95% CI 0.95-1.91, p<0.05  |
| Number of nights wake per week | 4.0             | 1.87                     | MD 2.18; 95% CI 0.55-2.36, p<0.05  |
| Number of awakenings per night | 1.54            | 0.58                     | MD 0.97; 95% CI 0.43-1.39, p<0.05  |
| Duration of awakenings (mins)  | 33.59           | 10.55                    | MD 23.31; 95% CI 7.65-35.6, p<0.05 |
| Number of hours sleep (hrs)    | 6.27            | 8.62                     | MD 2.35; 95% CI 1.64-3.06; p<0.05  |

Parent/Carer Wellbeing

1  
2  
3 When asked about the impacts on parental wellbeing of the child's sleep problem, 50/56 primary  
4 respondents were the mother, 3/56 were care-workers and 3/56 were foster carers. All wellbeing  
5 scores improved following the intervention and all but two reached statistical significance (Figure 3).  
6  
7  
8  
9

10  
11  
12 Days missed from school reduced from 20.9 to 18.5; number of days missed from work reduced  
13 from 9.2 to 0. Number of visits to HCP and non-HCP reduced by 4 and 23 respectively. There were  
14 fewer reported illnesses in parents/carers (headaches, anxiety, depression and general tiredness)  
15 and in children (viral illnesses and colds). None of these measures of the wider impacts of the sleep  
16 intervention reached statistical significance but all showed improvement.  
17  
18  
19  
20  
21  
22

#### 23 24 25 Parent/carer feedback

26  
27 Of the 39 parent/carers that responded following the intervention, 31 felt the intervention had  
28 helped their child, 33 reported that the intervention had helped their role as a parent or carer and  
29 32 believed the intervention helped other children in the household.  
30  
31  
32  
33

34  
35 Some parents felt that behaviour was unchanged and that the child still could not switch off at  
36 bedtime. However, the majority of comments at the final visit were positive, noting improvements  
37 at school, "no more battles", the ability to start new activities and go on holiday, improved energy,  
38 confidence and relationships. 100% parents/carers said that they would recommend the  
39 programme, even if it had not been successful for their child. The key enabling factor in the parental  
40 feedback was the regular telephone support.  
41  
42  
43  
44  
45  
46  
47  
48  
49  
50  
51  
52

#### 53 Implementation model

54  
55 The implementation model (figure 4) was developed using a whole systems/whole population  
56 approach looking at complexity of need against breadth of reach, ranging from awareness raising  
57  
58  
59  
60

1  
2  
3 and promotion, through universal settings, targeted support for complex situations to specialist  
4 support. The final step in the referral pathway is the Sheffield Children's Hospital Clinic.  
5  
6  
7  
8  
9

10 Where sleep interventions are delivered, the model is mainly based upon a hub and spoke model,  
11 with existing staff taking on sleep as part of their role and Sleep Practitioner leads (either  
12 geographically or within specific service areas) driving and supporting implementation.  
13  
14  
15  
16  
17

18 By building capacity into the workforce, members of staff have been trained as sleep practitioners  
19 across the key services: Parenting, Health visiting, Inclusion, SEND, Children's Residential Homes. All  
20 early help staff have been given awareness training and staff trained in 24 Schools.  
21  
22  
23  
24  
25  
26  
27  
28  
29  
30  
31  
32  
33  
34  
35  
36  
37  
38  
39  
40  
41  
42  
43  
44  
45  
46  
47  
48  
49  
50  
51  
52  
53  
54  
55  
56  
57  
58  
59  
60

## Discussion

The key findings from this evaluation were that, with an individual sleep programme and support from a sleep practitioner, children's total sleep time and parent/carer mental wellbeing were significantly improved. In addition, parents' confidence in their ability to achieve their goals, healthcare utilisation, illnesses and medication use were also improved. Through partnership working a local integrated model of sleep support delivery has been established.

The finding that a behavioural intervention for sleep support is effective is not novel. Previous projects have shown efficacy of behavioural sleep support delivered both by the third sector and in healthcare settings<sup>12-14</sup>. Our study has shown that delivery and implementation of sleep support within existing local services is feasible for groups of vulnerable children in the community. We have shown that empowering parents to implement consistent sleep routines at home, giving them a sense of achievement, as well as more sleep, led to a significant improvement in mental wellbeing. The support offered by the practitioners is a complex package of care using a whole systems approach. This package has not been formally described in terms of a behaviour change model and future research to explore this further would be beneficial to understanding the most effective elements of the intervention package. Our observation was that the effectiveness of the one to one clinic model and the group workshop were equivalent, but that parent's preferences differed. The key aspect of the delivery model that parents consistently reported to be the most effective was the follow up support in the form of phone calls or emails.

Barriers to the implementation of the intervention to families included engagement of the young person (usually around negotiating removal of technology), finding the optimum time at which to introduce the programme around other events at home or other therapies taking priority, parental tiredness and mental state and logistics such as other children in the home or lack of support for the parent. Parental motivation was another factor as many felt they had tried sleep support before or

1  
2  
3 believed that other issues such as the ADHD diagnosis would prevent the intervention from being  
4 helpful. The skill needed to motivate parents and young people beyond their initial beliefs is a  
5 requirement of a sleep practitioner as well as a knowledge of sleep. A consistent and whole  
6 household approach is crucial, along with appropriate timing.  
7  
8  
9  
10

11  
12  
13  
14  
15  
16 Recruitment was opportunistic and relied on an initial approach and referral to the project by a  
17 member of the child's clinical team (for ADHD patients) or key worker (for LAAC). The recruitment of  
18 participants was therefore dictated by the referral rate possible within the timeframe of the project.  
19 Time was devoted at the beginning of the project to visit the appropriate agencies with information  
20 about the project and recruitment process. Barriers to recruitment were largely centred around the  
21 availability and engagement of the referring staff with some expressing a great deal of enthusiasm  
22 for the project and others citing lack of time and changes in management structure as barriers to  
23 engagement.  
24  
25  
26  
27  
28  
29  
30  
31  
32  
33  
34  
35  
36

37 There was a 30% withdrawal rate from our study with 11/56 participants unable to proceed with the  
38 intervention. Despite this, all participants that started the intervention did complete it and only 6/56  
39 were lost to follow-up. The baseline characteristics of the children whose parent/carer withdrew  
40 were the same as those that completed the intervention and evaluation in terms of gender, age,  
41 underlying diagnosis or residential placement. The only difference noted was that 10/17 families  
42 that withdrew had a lone parent and 12/39 of the group that completed had a lone parent. This  
43 factor may have impaired their ability to engage and should be highlighted for particular support in  
44 future implementation of this intervention. Reasons for withdrawal cited by the families were  
45 generally practical, including house moves, mental illness and changes to medication. In a real-life  
46 setting these factors would have been noted and support offered to parents at a later date,  
47  
48  
49  
50  
51  
52  
53  
54  
55  
56  
57  
58  
59  
60

1  
2  
3 however, given the time constraints of a research study it was not possible to include these families  
4  
5 further in this project.  
6  
7  
8  
9

10 Caution is needed when interpreting the results of this observational study. Without a concurrent  
11 control group it cannot be assumed that observed changes were directly due to the intervention.  
12  
13 Whilst the changes may have been influenced by other interventions introduced at the time of the  
14 study, it is likely however that the sleep intervention did have significant results in these children  
15  
16 with severe long-term sleep problems. Time points were not standardised and varied from patient to  
17 patient depending on the complexity of the case and the number of contacts needed for each  
18 individual family. It was therefore decided that, rather than analysing according to non-standardised  
19 time points, that only the pre- and post-evaluation time points would be analysed. We accept that  
20 parental observation of children's sleep times is subjective and may be inaccurate. However, in  
21 asking the same parent to assess their child before and after the intervention it was deemed to be as  
22 accurate as possible in the absence of an objective measure. Our experience of objective  
23 measurements of sleep duration such as actigraphy is that children's sleep is disturbed by the  
24 presence of the monitor and although this method was considered, it was not feasible within the  
25 scope of the study and therefore subjective measures were used.  
26  
27  
28  
29  
30  
31  
32  
33  
34  
35  
36  
37  
38  
39  
40  
41  
42  
43  
44  
45

46 Due to the withdrawal rate two analyses were carried out. A per protocol analysis was carried out on  
47 those participants that completed the intervention and provided data on the outcome measures.  
48 We recognise however that this analysis results in an over-representation and represents the  
49 maximum potential or "best case" results. Analysis taking into account withdrawals was therefore  
50 also carried out based on the assumption that baseline data would remain unchanged without the  
51 intervention and using imputed values for the final outcome measure by carrying forward the  
52 baseline value for research participants lost to follow-up. These results represent the "worst case"  
53  
54  
55  
56  
57  
58  
59  
60

1  
2  
3 and an under-representation of the outcomes because the 11 participants that had received the  
4 intervention and were likely to have improved from baseline. In reality, the outcomes that truly  
5 reflect the intervention are likely to lie between those generated by the two analysis methods.  
6  
7  
8  
9

10  
11  
12 One of the enabling factors for the project was the partnership between the Children's Hospital  
13 Trust, the City Council and The Children's Sleep Charity (TCSC). The integrated working across local  
14 authority, health, and third sector brought together providers and commissioners with expertise in  
15 strategic planning, research and sleep. The Sleep Practitioners' experience in parenting and  
16 education enabled them to understand complex situations over and above the sleep difficulties  
17 which were fundamental to addressing some of the complex situations that arose. Challenges faced  
18 by the joint initiative included the requirement to submit the project to both NHS and local authority  
19 governance frameworks. Aligning this process and different organisational cultures and  
20 expectations was more challenging than anticipated. However, the partnership working opened  
21 doors and opportunities that otherwise would not be available, ultimately leading to better  
22 provision for families.  
23  
24  
25  
26  
27  
28  
29  
30  
31  
32  
33  
34  
35  
36  
37  
38

39 The proposed implementation model was designed to address the concepts of whole family working  
40 to connect parenting, health and wellbeing with sleep and to create accessible support for all  
41 families. Barriers to the implementation of the service model were twofold - workforce and training  
42 resources and engagement of services and individual staff. However, since oral dissemination of the  
43 results in our region has taken place some of these barriers are being overcome. There remain a  
44 number of resource gaps which include continued workforce training, support networks, awareness  
45 raising and signposting to services and resources, expansion into other services including primary  
46 care, co-ordination and triage, implementation and mentorship materials for school, accessible  
47 information on-line and further evidence gathering and research.  
48  
49  
50  
51  
52  
53  
54  
55  
56  
57  
58  
59  
60



1  
2  
3 We suggest that this relatively inexpensive approach can be implemented in both local authority and  
4 health services by integration into the existing workforce. We would recommend that staff training  
5 in sleep support and early intervention using an integrated cross-agency model would benefit  
6 children and their parents and save NHS healthcare costs by addressing issues as a first-line  
7 intervention before escalation to more specialist services.  
8  
9  
10  
11  
12  
13  
14  
15  
16  
17  
18

19 **Acknowledgement:** We would like to thank the children and their families and carers for taking part  
20 in the project. We would also like to thank the Ryegate Children's centre, CAMHS, MAST and SEND  
21 services for their support throughout the project.  
22  
23  
24  
25  
26  
27

#### 28 **Funding Statement**

29 This work was supported by The Health Foundation grant ref 3042  
30  
31  
32  
33

#### 34 **Competing Interests Statement**

35 No conflicts of interest to declare.  
36  
37  
38  
39

#### 40 **Contributorship Statement**

41 All authors were involved in the planning and reporting of the study, all authors have reviewed the  
42 final manuscript.  
43  
44

45 HE led the study, supervised the research team, led the NHS strategic planning, analysed the results  
46 and wrote the main body of the report.  
47  
48

49 CL and LH led the Local Authority strategic planning and supervised the sleep practitioners.  
50

51 SS and AI delivered the sleep practitioner intervention  
52

53 VD trained and supervised the sleep practitioners and led the charity strategic planning  
54

55 RK and JR delivered the evaluations, data collection and recording.  
56  
57  
58  
59  
60

**“What is already known on this topic”**

1. Sleep deprivation due to behavioural insomnia has an impact on physical, mental and emotional health and wellbeing for the child and family.
2. Intensive sleep support interventions are effective but access to support is patchy and, in most areas, offered only by the voluntary sector.
3. Integrated multiagency working is an NHS priority area.

**“What this study adds”**

4. Cross-agency sleep support delivered via an integrated delivery model has shown efficacy and can be implemented by integration into the existing workforce.
5. Using this approach, an average of an extra 2.4 hours of sleep per night was achieved as well as a significant improvement in parent/carer wellbeing.
6. Key to achieving success with the intervention was the use of follow-up motivational telephone support.

## References

1. Walker M. *Why We Sleep: The New Science of Sleep and Dreams*. 2018. Allen Lane; 01 edition ISBN-13: 978-0241269060
2. American Academy of Sleep Medicine. 2005. *International Classification of Sleep Disorders, 2nd ed.: Diagnostic and coding manual* Westchester, IL: Author.
3. Wiggs L Behavioural aspects of children's sleep. *Arch Dis Child*. 2009 Jan;94(1):59-62. doi: 10.1136/adc.2007.125278. Epub 2008 Oct 31.
4. Melzer LJ. Clinical management of behavioral insomnia of childhood: treatment of bedtime problems and night wakings in young children. *Behav Sleep Med*. 2010;8(3):172-89. doi: 10.1080/15402002.2010.487464.
5. Simola P, Liukkonen K, Pitkäranta A, Pirinen T, Aronen ET. Psychosocial and somatic outcomes of sleep problems in children: a 4-year follow-up study. *Child Care Health Dev*. 2014 Jan;40(1):60-7. doi: 10.1111/j.1365-2214.2012.01412.x.
6. Dewald JF, Meijer AM, Oort FJ, Kerkhof GA, Bögels SM. The influence of sleep quality, sleep duration and sleepiness on school performance in children and adolescents: A meta-analytic review. *Sleep Med Rev*. 2010 (3):179-89;
7. Montgomery P, Wiggs L. Definitions of sleeplessness in children with attention-deficit hyperactivity disorder (ADHD): implications for mothers' mental state, daytime sleepiness and sleep-related cognitions. *Child Care Health Dev*. 2015 Jan;41(1):139-46. doi: 10.1111/cch.12165. Epub 2014 Jun 12.
8. Doo S, Wing YK. Sleep problems of children with pervasive developmental disorders: correlation with parental stress. *Dev Med Child Neurol*. 2006 Aug;48(8):650-5.
9. Tietze A, Zernikow B, Michel E, Blankenburg M. Sleep disturbances in children, adolescents, and young adults with severe psychomotor impairment: impact on parental quality of life and sleep *Developmental Medicine & Child Neurology* 2014, 56: 1187–1193

- 1  
2  
3 10. Katie Turner, Lydia Bullock, Amy Down, Katie Brown, Karon Foulkes, Louise  
4  
5 Thomson Sleep Tight: An evaluation of a community-based intervention on the sleep  
6  
7 behaviours of young children *Journal of Health Visiting* › November 2016 › Volume 4 Issue 11  
8  
9  
10 Turner K, Bullock L, Down A, Brown K, Foulkes K, Thomson L. *Journal of Health Visiting* ›  
11  
12 November 2016 › Volume 4 Issue 11:572-578.  
13  
14 11. Quine L. Sleep problems in children with mental handicap. *J Mental Defic Res* 1991;35:269-  
15  
16 90.  
17  
18 12. Scantlebury A, McDaid C, Dawson V, Elphick H, Fairhurst C, Hewitt C, Parker A, Spiers G,  
19  
20 Thomas M, Wright K, Beresford B. Non-pharmacological interventions for non-respiratory  
21  
22 sleep disturbance in children with neurodisabilities: a systematic review. *Developmental*  
23  
24 *Medicine and Child Neurology* 2018.  
25  
26 13. Keshavarzi Z, Bajoghli H, Mohamadi MR, et al. In a randomized case-control trial with 10-  
27  
28 years olds suffering from attention deficit/hyperactivity disorder (ADHD) sleep and  
29  
30 psychological functioning improved during a 12-week sleep-training program. *World J*  
31  
32 *BiolPsychiatry* 2014;15:609–19.  
33  
34 14. Corkum P, Lingley-Pottie P, Davidson F, et al. Better nights/better days—distance  
35  
36 intervention for insomnia in school-aged children with/without ADHD: a randomized  
37  
38 controlled trial. *J Pediatr Psychol* 2016;41:1–13 <http://dx.doi.org/10.1093/jpepsy/jsw1031>  
39  
40  
41  
42  
43  
44  
45  
46  
47  
48  
49  
50  
51  
52  
53  
54  
55  
56  
57  
58  
59  
60

## Figure Legends

### Figure 1. Goal progress chart

Parent/carers were asked to suggest a goal to work towards and to score their impression of their current achievement of that goal at each contact with the sleep practitioner by circling their chosen number on the chart. The progress documented on the chart served as a motivational tool.

### Figure 2. Project flowchart.

Thirty-four participants either did not respond to initial contact from the sleep practitioners or disengaged. 10 participants failed to attend or cancelled the workshop or clinic appointments after the baseline visit. After completing the workshop or clinic, one family did not respond to contacts for arranging the final visit and 5 families disengaged without giving a reason. 39 participants completed the final evaluation.

Figure 3. Parent/carer wellbeing scores pre- and post-intervention. Scores were on a scale of 1-5, with 1 being none of the time and 5 being all of the time, ie a low score indicated good quality of life and a high score indicated poor quality of life. \* represents  $p < 0.05$ .

Figure 4. The proposed implementation model for cross-agency delivery of sleep support services

### Multi-Agency Support Team - Goal Progress Chart

Name \_\_\_\_\_

**GOAL:**

Who agreed this Goal (child, parent, worker): \_\_\_\_\_

| Session                                                                                                                                                                                      | Date | Today I would rate progress to this goal:<br>(Please circle the appropriate number below) |   |   |   |   |   |   |   |   |   |    |
|----------------------------------------------------------------------------------------------------------------------------------------------------------------------------------------------|------|-------------------------------------------------------------------------------------------|---|---|---|---|---|---|---|---|---|----|
| <i>Remember a score of zero means no progress has been made towards a goal, a score of ten means a goal has been reached fully, and a score of five is exactly half way between the two.</i> |      |                                                                                           |   |   |   |   |   |   |   |   |   |    |
| 1                                                                                                                                                                                            |      | 0                                                                                         | 1 | 2 | 3 | 4 | 5 | 6 | 7 | 8 | 9 | 10 |
| 2                                                                                                                                                                                            |      | 0                                                                                         | 1 | 2 | 3 | 4 | 5 | 6 | 7 | 8 | 9 | 10 |
| 3                                                                                                                                                                                            |      | 0                                                                                         | 1 | 2 | 3 | 4 | 5 | 6 | 7 | 8 | 9 | 10 |
| 4                                                                                                                                                                                            |      | 0                                                                                         | 1 | 2 | 3 | 4 | 5 | 6 | 7 | 8 | 9 | 10 |
| 5                                                                                                                                                                                            |      | 0                                                                                         | 1 | 2 | 3 | 4 | 5 | 6 | 7 | 8 | 9 | 10 |
| 6                                                                                                                                                                                            |      | 0                                                                                         | 1 | 2 | 3 | 4 | 5 | 6 | 7 | 8 | 9 | 10 |
| 7                                                                                                                                                                                            |      | 0                                                                                         | 1 | 2 | 3 | 4 | 5 | 6 | 7 | 8 | 9 | 10 |
| 8                                                                                                                                                                                            |      | 0                                                                                         | 1 | 2 | 3 | 4 | 5 | 6 | 7 | 8 | 9 | 10 |
| 9                                                                                                                                                                                            |      | 0                                                                                         | 1 | 2 | 3 | 4 | 5 | 6 | 7 | 8 | 9 | 10 |
| 10                                                                                                                                                                                           |      | 0                                                                                         | 1 | 2 | 3 | 4 | 5 | 6 | 7 | 8 | 9 | 10 |
| 11                                                                                                                                                                                           |      | 0                                                                                         | 1 | 2 | 3 | 4 | 5 | 6 | 7 | 8 | 9 | 10 |
| 12                                                                                                                                                                                           |      | 0                                                                                         | 1 | 2 | 3 | 4 | 5 | 6 | 7 | 8 | 9 | 10 |

1  
2  
3  
4  
5  
6  
7  
8  
9  
10  
11  
12  
13  
14  
15  
16  
17  
18  
19  
20  
21  
22  
23  
24  
25  
26  
27  
28  
29  
30  
31  
32  
33  
34  
35  
36  
37  
38  
39  
40  
41  
42  
43  
44  
45  
46  
47  
48  
49  
50  
51  
52  
53  
54  
55  
56  
57  
58  
59  
60

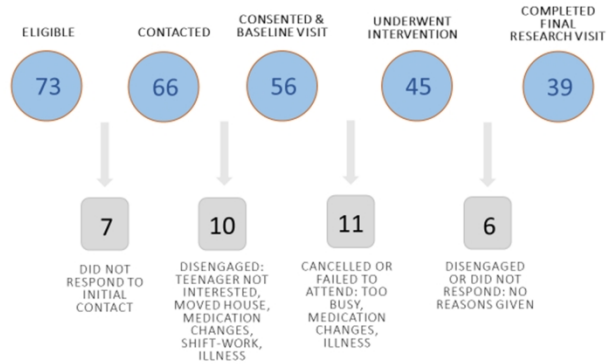

210x296mm (300 x 300 DPI)

1  
2  
3  
4  
5  
6  
7  
8  
9  
10  
11  
12  
13  
14  
15  
16  
17  
18  
19  
20  
21  
22  
23  
24  
25  
26  
27  
28  
29  
30  
31  
32  
33  
34  
35  
36  
37  
38  
39  
40  
41  
42  
43  
44  
45  
46  
47  
48  
49  
50  
51  
52  
53  
54  
55  
56  
57  
58  
59  
60

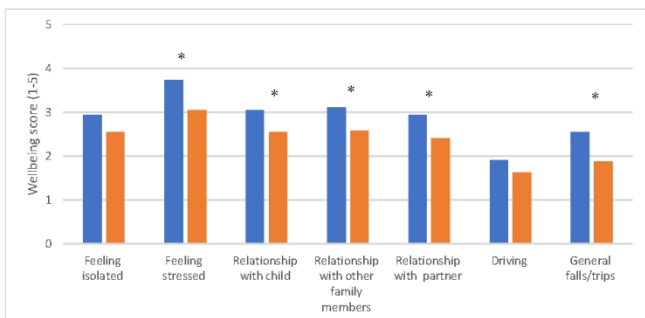

209x297mm (150 x 150 DPI)



1  
2  
3  
4  
5  
6  
7  
8  
9  
10  
11  
12  
13  
14  
15  
16  
17  
18  
19  
20  
21  
22  
23  
24  
25  
26  
27  
28  
29  
30  
31  
32  
33  
34  
35  
36  
37  
38  
39  
40  
41  
42  
43  
44  
45  
46  
47  
48  
49  
50  
51  
52  
53  
54  
55  
56  
57  
58  
59  
60

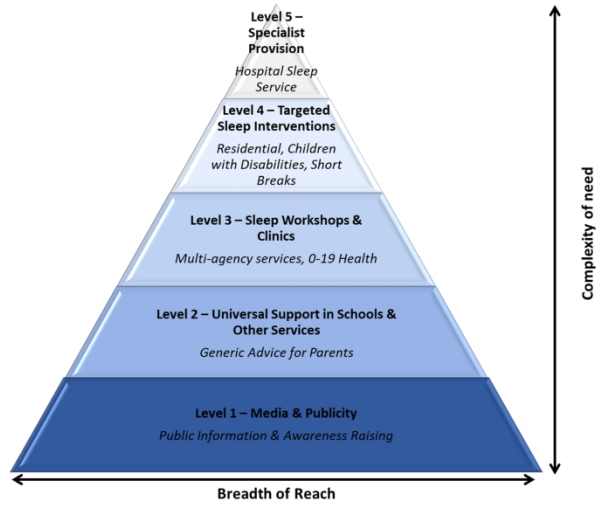

210x296mm (300 x 300 DPI)

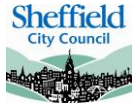

## Sheffield Children and Young People Sleeping Well Research Project

### Your Child's Sleep Pattern Questions

*In this research project, the term 'your child' refers to the child in your care for which you have a concern about their sleep.*

Study ID: \_\_\_\_\_

Baseline Evaluation  Intermediate Evaluation  Follow-up Evaluation

Completed by: Parent/Carer

1. What time does your child usually go up to bed?
2. What time does your child usually settle down to try and sleep?
3. How long does it take for your child to usually fall asleep?
4. How many nights a week does your child usually wake?
5. How many times a night do they usually wake?
6. How long are they usually awake for?
7. Do you usually get up to them?
8. Overall, how many hours sleep does your child usually get a night?
9. What time do they finally wake in the morning?
10. Do they need to be woken up?
11. What is their mood on waking?

## Sheffield Children and Young People Sleeping Well Research Project

Study ID: \_\_\_\_\_ Completed by: Parent/Carer

Baseline Evaluation  Intermediate Evaluation  Follow-up Evaluation

### Impact on Wellbeing and Quality of Life Adult Participant

*In this project, the term 'your child' refers to the child in your care for which you have a concern about their sleep.*

**Parent / Carer 1:**

|     |                                                                                                                                                                                                                |                                                             |
|-----|----------------------------------------------------------------------------------------------------------------------------------------------------------------------------------------------------------------|-------------------------------------------------------------|
| 1.1 | The number of days missed from work in the past two weeks due to the sleep difficulties                                                                                                                        |                                                             |
| 1.2 | Have you visited a Healthcare Professional in the past two weeks (e.g. Health Visitors / GP / A&E)                                                                                                             | Yes <input type="checkbox"/><br>No <input type="checkbox"/> |
| 1.3 | If yes, which healthcare professionals and how many visits in the past two weeks                                                                                                                               | .....<br>.....<br>.....<br>.....                            |
| 1.4 | Have you had any periods of ill health in the past two weeks? Please explain:                                                                                                                                  |                                                             |
| 1.5 | Are you currently using any medications: Name/type and level of medication                                                                                                                                     |                                                             |
| 1.6 | Have you made any changes to your work patterns (e.g. different shifts / reduced hours / change of job ) because of the sleep difficulties in the past two weeks?                                              |                                                             |
| 1.7 | Have you contacted any non-health care professionals in the past two weeks (e.g. Teacher, MAST workers, support workers, Supervising Social Workers) about any issues related to your child's sleep difficulty | Yes <input type="checkbox"/><br>No <input type="checkbox"/> |
| 1.8 | If yes, which non-healthcare professional and the number of contacts in the past two weeks                                                                                                                     | .....<br>.....<br>.....<br>.....                            |

## Sheffield Children and Young People Sleeping Well Research Project

**On a Scale of 1-5: 1 being 'None of the Time' and 5 being 'All of the Time'**  
**Over the past two weeks how do you feel your child's sleep disturbance has impacted on your quality of life?**

|      | Statement                                                                           | None of the time | Rarely | Some of the time | Often | All of the time |
|------|-------------------------------------------------------------------------------------|------------------|--------|------------------|-------|-----------------|
| 1.9  | It makes me feel isolated                                                           | 1                | 2      | 3                | 4     | 5               |
| 1.10 | It makes me feel stressed                                                           | 1                | 2      | 3                | 4     | 5               |
| 1.11 | It is impacting on my relationship with my child (with the sleep disturbance)       | 1                | 2      | 3                | 4     | 5               |
| 1.12 | It is impacting on my relationship with other family members                        | 1                | 2      | 3                | 4     | 5               |
| 1.13 | It is impacting on my relationship with my spouse/partner                           | 1                | 2      | 3                | 4     | 5               |
| 1.14 | It is impacting on my ability to drive, or drive safely with due care and attention | 1                | 2      | 3                | 4     | 5               |
| 1.15 | It is impacting on the number of general trips, bumps and accidents (not driving)   | 1                | 2      | 3                | 4     | 5               |

**Strengths and Difficulties Questionnaires**

Parents, the child/young person, if appropriate, and teachers completed a strengths and difficulties questionnaire (SDQ). For each item, the participant was asked to mark the box Not True, Somewhat true and Certainly true. Questionnaires were scored using a standardised system, into the following categories: overall stress, overall emotional distress, behavioural difficulties, hyperactivity and concentration difficulties, difficulties getting along with other children, kind and helpful behaviour and the impact of any difficulties on the young person’s life. Parent/carers, child/young person and teachers were scored separately.

38 parents/carers completed the SDQ (one child was <2 years). The SDQ was age appropriate - 1 completed 2-4, 37 completed 4-17yr. Figures 2a, b and c show the results of the SDQs for parents (n=38), self-assessment (n=5) and teachers (n=17).

On per-protocol analysis, there was a significant change in the parents’ scoring of behavioural difficulties (MD 1.05, 95% confidence intervals 0.50-1.60, p<0.05). There was a significant change in the self-reporting of emotional distress (MD 0.18, 95% confidence intervals -1.7-2.1, p<0.05) and in the teachers’ reports of emotional distress (MD 1.42, 95% confidence intervals 0.17-2.67, p<0.05). All other measures were not significantly changed following the intervention.

Figure 2a

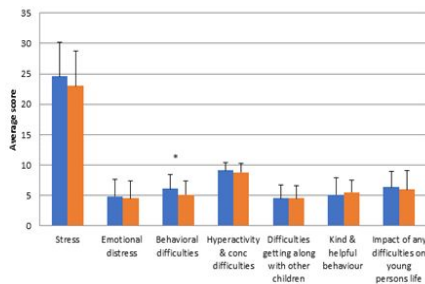

Figure 2b

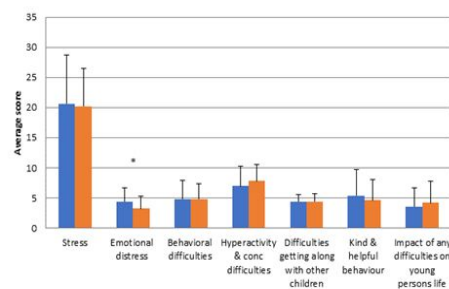

Figure 2c

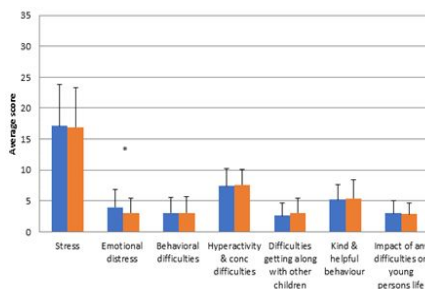

We accept that numbers are small, especially for the self-assessment and we do not wish to overstate the potential significance of these changes.

## Median(range) SDQ scores pre- and post-intervention: Parent (n=38)

|      | Stress     | Emotional distress | Behavioural difficulties | Hyperactivity | Diff with other children | Kind and helpful | Impact on child |
|------|------------|--------------------|--------------------------|---------------|--------------------------|------------------|-----------------|
| Pre  | 24 (11-34) | 5 (0-9)            | 6 (1-10)                 | 10 (4-10)     | 4 (1-8)                  | 6 (0-10)         | 7 (1-10)        |
| Post | 23 (9-33)  | 4 (0-10)           | 5 (0-10)                 | 9 (1-10)      | 5 (1-8)                  | 6 (0-9)          | 6 (0-10)        |

## Median(range) SDQ scores pre- and post-intervention: Teacher (n=17)

|      | Stress    | Emotional distress | Behavioural difficulties | Hyperactivity | Diff with other children | Kind and helpful | Impact on child |
|------|-----------|--------------------|--------------------------|---------------|--------------------------|------------------|-----------------|
| Pre  | 18 (4-28) | 4 (0-10)           | 4 (0-8)                  | 8 (2-10)      | 2 (0-6)                  | 5 (0-10)         | 3 (0-6)         |
| Post | 17 (7-25) | 3 (0-7)            | 3 (0-10)                 | 8 (3-10)      | 3 (0-9)                  | 6 (0-10)         | 3 (0-6)         |

## Median(range) SDQ scores pre- and post-intervention: Young Person (n=5)

|      | Stress     | Emotional distress | Behavioural difficulties | Hyperactivity | Diff with other children | Kind and helpful | Impact on child |
|------|------------|--------------------|--------------------------|---------------|--------------------------|------------------|-----------------|
| Pre  | 23 (7-29)  | 6 (1-10)           | 5 (0-9)                  | 8 (2-10)      | 4 (1-8)                  | 5 (0-10)         | 4 (0-9)         |
| Post | 18 (12-28) | 3 (1-5)            | 5 (3-9)                  | 8 (3-10)      | 4 (1-6)                  | 5 (0-9)          | 3 (1-10)        |
