# Supplementary material for: Pilot study of an integrated model of sleep support for children: a before and after evaluation
Source: PubMed Central journal article supplement — BMJ Paediatr Open. 2019 Nov 10;3(1):e000551. doi: 10.1136/bmjpo-2019-000551 (PMC6863653; doi:10.1136/bmjpo-2019-000551), 2019-11-10
Supplement: bmjpo-2019-000551supp002.pdf [file bmjpo-2019-000551supp002.pdf]

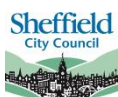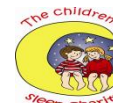

## Sheffield Children and Young People Sleeping Well Research Project

Study ID: \_\_\_\_\_

 Completed by: Parent/Carer 

 Baseline Evaluation 

 Intermediate Evaluation 

 Follow-up Evaluation 

### Impact on Wellbeing and Quality of Life Adult Participant

*In this project, the term 'your child' refers to the child in your care for which you have a concern about their sleep.*

#### Parent / Carer 1:

|     |                                                                                                                                                                                                                |                                                             |
|-----|----------------------------------------------------------------------------------------------------------------------------------------------------------------------------------------------------------------|-------------------------------------------------------------|
| 1.1 | The number of days missed from work in the past two weeks due to the sleep difficulties                                                                                                                        |                                                             |
| 1.2 | Have you visited a Healthcare Professional in the past two weeks (e.g. Health Visitors / GP / A&E)                                                                                                             | Yes <input type="checkbox"/><br>No <input type="checkbox"/> |
| 1.3 | If yes, which healthcare professionals and how many visits in the past two weeks                                                                                                                               | .....<br>.....<br>.....<br>.....                            |
| 1.4 | Have you had any periods of ill health in the past two weeks? Please explain:                                                                                                                                  |                                                             |
| 1.5 | Are you currently using any medications: Name/type and level of medication                                                                                                                                     |                                                             |
| 1.6 | Have you made any changes to your work patterns (e.g. different shifts / reduced hours / change of job ) because of the sleep difficulties in the past two weeks?                                              |                                                             |
| 1.7 | Have you contacted any non-health care professionals in the past two weeks (e.g. Teacher, MAST workers, support workers, Supervising Social Workers) about any issues related to your child's sleep difficulty | Yes <input type="checkbox"/><br>No <input type="checkbox"/> |
| 1.8 | If yes, which non-healthcare professional and the number of contacts in the past two weeks                                                                                                                     | .....<br>.....<br>.....<br>.....                            |

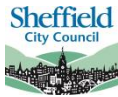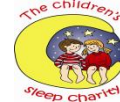

## Sheffield Children and Young People Sleeping Well Research Project

**On a Scale of 1-5: 1 being 'None of the Time' and 5 being 'All of the Time'  
 Over the past two weeks how do you feel your child's sleep disturbance has impacted  
 on your quality of life?**

|      | Statement                                                                           | None of the time | Rarely | Some of the time | Often | All of the time |
|------|-------------------------------------------------------------------------------------|------------------|--------|------------------|-------|-----------------|
| 1.9  | It makes me feel isolated                                                           | 1                | 2      | 3                | 4     | 5               |
| 1.10 | It makes me feel stressed                                                           | 1                | 2      | 3                | 4     | 5               |
| 1.11 | It is impacting on my relationship with my child (with the sleep disturbance)       | 1                | 2      | 3                | 4     | 5               |
| 1.12 | It is impacting on my relationship with other family members                        | 1                | 2      | 3                | 4     | 5               |
| 1.13 | It is impacting on my relationship with my spouse/partner                           | 1                | 2      | 3                | 4     | 5               |
| 1.14 | It is impacting on my ability to drive, or drive safely with due care and attention | 1                | 2      | 3                | 4     | 5               |
| 1.15 | It is impacting on the number of general trips, bumps and accidents (not driving)   | 1                | 2      | 3                | 4     | 5               |
